# Supplementary material
Source: ML conference proceedings conference paper supplement (https://openreview.net/forum?id=I6pTDAQE8V)

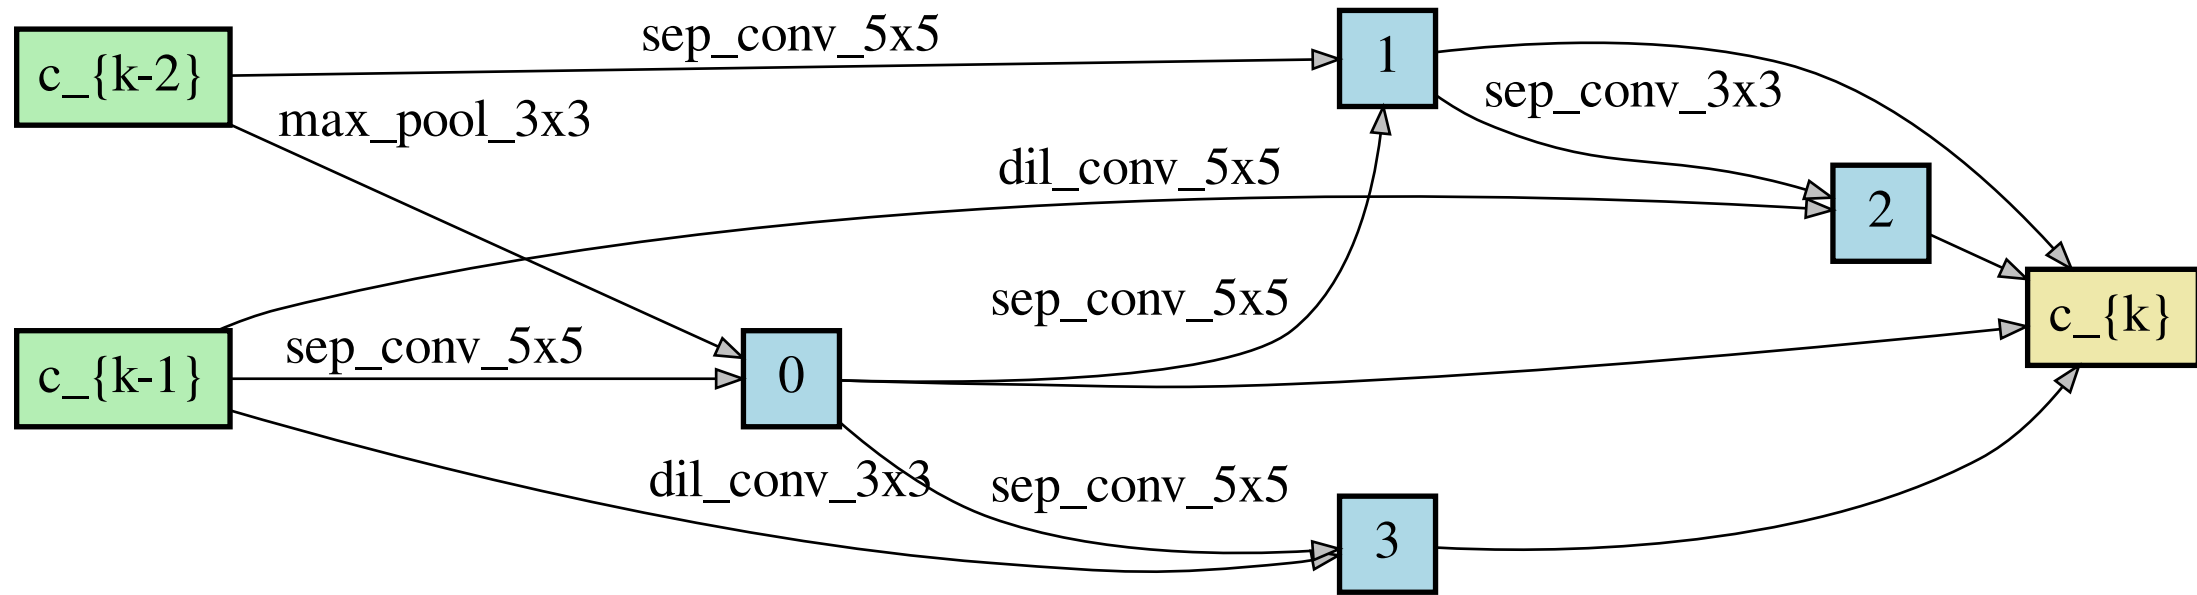

Supplement: supplementary_material [file normal.pdf › SNAP_ICLR_Sup/SNAP_Code/DARTS_evaluation_1/normal.pdf]

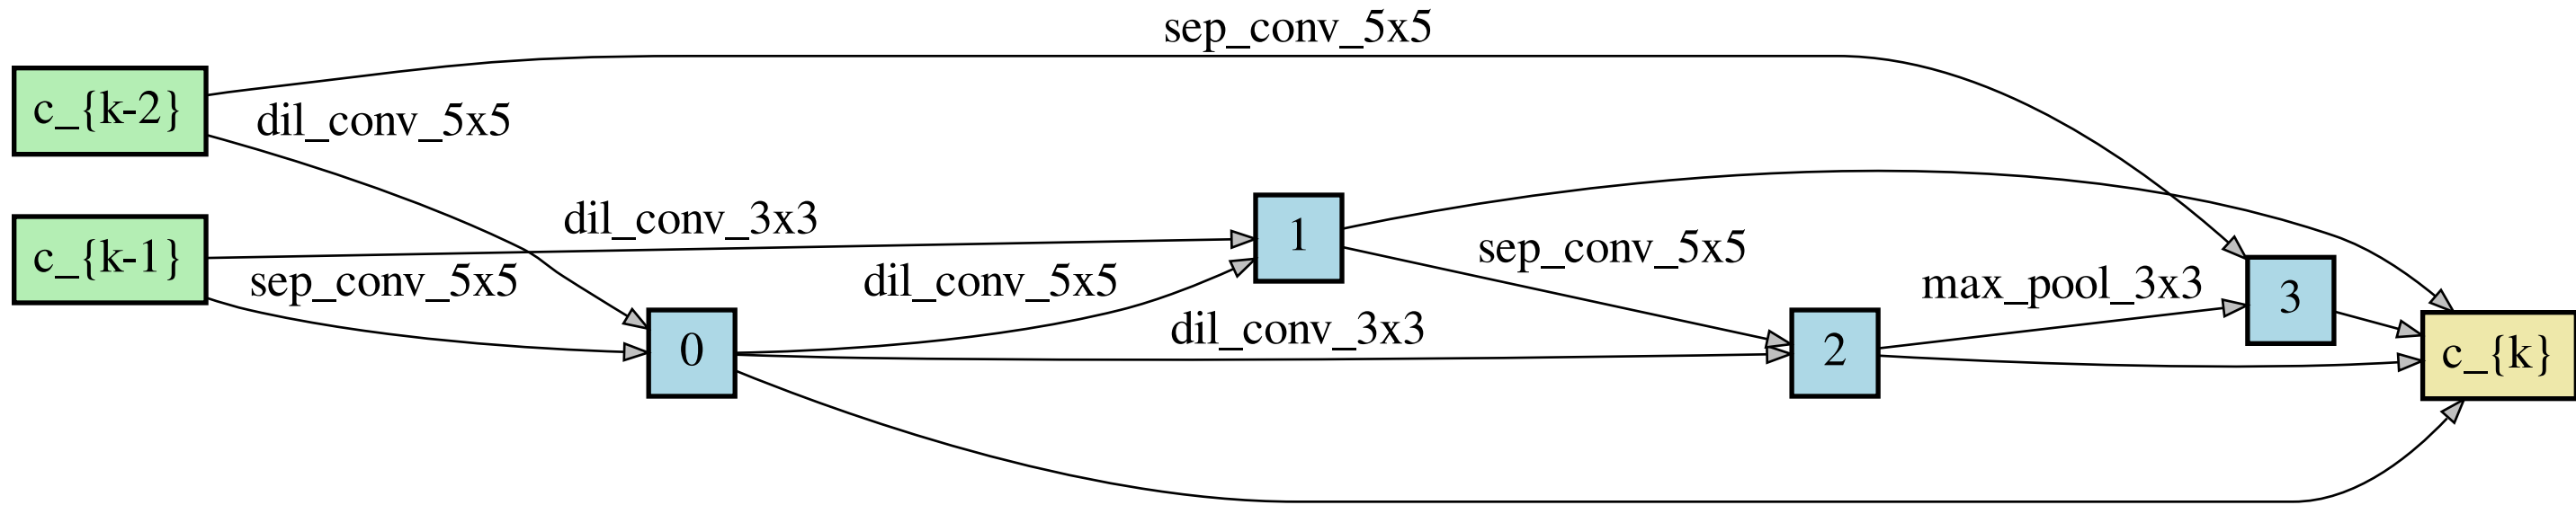

Supplement: supplementary_material [file reduction.pdf › SNAP_ICLR_Sup/SNAP_Code/DARTS_evaluation_1/reduction.pdf]



Supplement: supplementary_material [file normal.pdf › SNAP_ICLR_Sup/SNAP_Code/DARTS_evaluation_1/result_visualize/normal.pdf]



Supplement: supplementary_material [file reduction.pdf › SNAP_ICLR_Sup/SNAP_Code/DARTS_evaluation_1/result_visualize/reduction.pdf]
